# Supplementary material
Source: PubMed Central journal article supplement (PMC7239793)
Supplement: mmc1.pdf [file mmc1.pdf]

## Supplement 1. Study drug titration scheme

| <b>Starting dose</b>                                                                                                                                                                    |                                            |
|-----------------------------------------------------------------------------------------------------------------------------------------------------------------------------------------|--------------------------------------------|
| SBP $\geq 115$ mmHg                                                                                                                                                                     | Valsartan 160mg or matching placebo b.i.d. |
| SBP $\geq 105$ but $< 115$ mmHg                                                                                                                                                         | Valsartan 80mg or matching placebo b.i.d.  |
| <b>Dose titration for participants taking valsartan 160 mg or matching placebo b.i.d.</b>                                                                                               |                                            |
| SBP $\geq 105$ mmHg                                                                                                                                                                     | Continue study treatment unchanged         |
| SBP $\geq 95$ but $< 105$                                                                                                                                                               | Lower study treatment to 80mg b.i.d.       |
| SBP $< 95$ mmHg                                                                                                                                                                         | Skip study treatment once                  |
| <b>Dose titration for participants taking valsartan 80 mg or matching placebo b.i.d.</b>                                                                                                |                                            |
| SBP $\geq 95$ mmHg                                                                                                                                                                      | Continue study treatment unchanged         |
| SBP $< 95$ mmHg                                                                                                                                                                         | Skip study treatment once                  |
| <b>For participants that skipped previous dosage due to SBP <math>&lt; 95</math>mmHg</b>                                                                                                |                                            |
| SBP $\geq 95$ mmHg                                                                                                                                                                      | Start study treatment 80mg b.i.d.          |
| SBP $< 95$ mmHg                                                                                                                                                                         | Stop study treatment permanently           |
| <b>For the participant that meets the criteria for acute kidney injury</b>                                                                                                              |                                            |
| Definition: 50% decline in estimated glomerular filtration rate relative to baseline, or decrease of $> 30$ ml/min/1.73m <sup>2</sup> and to a value below 60 ml/min/1.73m <sup>2</sup> | Stop study treatment permanently           |
